1 Copper selects for siderophore-mediated virulence in *Pseudomonas aeruginosa*

2

3 Luke Lear<sup>1\*</sup>, Elze Hesse<sup>2</sup>, Angus Buckling<sup>2</sup> and Michiel Vos<sup>1</sup>.

4

5 <sup>1</sup>European Centre for Environment and Human Health, University of Exeter Medical School,  
6 Penryn, Cornwall, United Kingdom

7

8 <sup>2</sup>College of Life and Environmental Science, University of Exeter, Penryn, Cornwall, United  
9 Kingdom

10

11 \*Corresponding author

12

13 Keywords: evolution of virulence, opportunistic pathogen, metal detoxification, pyoverdine,  
14 coincidental selection.

15

16 Abstract

17

18 Iron is essential for almost all bacterial pathogens and consequently it is actively withheld by  
19 their hosts. The production of extracellular siderophores however enables iron sequestration  
20 by pathogens, increasing their virulence. Another function of siderophores is extracellular  
21 detoxification of non-ferrous metals. Here, we experimentally link the detoxification and  
22 virulence roles of siderophores by testing whether the opportunistic pathogen *Pseudomonas*  
23 *aeruginosa* displays greater virulence after exposure to copper stress. We incubated *P.*  
24 *aeruginosa* under different copper regimes for either two or twelve days. Subsequent growth  
25 in a copper-free environment removed phenotypic effects, before quantification of pyoverdine  
26 production (*P. aeruginosa*'s primary siderophore) and virulence using the *Galleria mellonella*  
27 infection model. Copper selected for increased pyoverdine production, which was positively  
28 associated with virulence. This effect increased with time. We here show a direct link between  
29 metal stress and bacterial virulence, highlighting another dimension of the detrimental effects  
30 of metal pollution on human health.

31

32

33

34

35

## Introduction

36

37 Iron is essential for the growth of almost all bacteria as it serves as a cofactor for many  
38 enzymes (1, 2). However, as iron most commonly exists in the insoluble form  $\text{Fe}^{3+}$  it is of  
39 relatively low bioavailability in the majority of environments (1-7). It is therefore essential for  
40 bacteria to actively sequester  $\text{Fe}^{3+}$  from the environment (8, 9), with many bacteria producing  
41 iron-chelating siderophore compounds to do this (10). Siderophores aid iron recovery by  
42 forming extracellular complexes with  $\text{Fe}^{3+}$  which are then taken up by the cell and reduced to  
43 the bioavailable form  $\text{Fe}^{2+}$  (11). The extracellular nature of siderophores means they can benefit  
44 the group around the producer, with only the producer paying the cost of production. As a result  
45 siderophore production is an altruistic cooperative trait subject to social evolution (12).  
46 Therefore as increased production evolves under iron limitation to benefit the producer and its  
47 kin, genotypes with reduced production can also evolve to exploit these producers and gain a  
48 fitness advantage (12). Due to the importance of iron for microbial growth, one of the first lines  
49 of host defence is to withhold iron from invading pathogens (13). This often involves the  
50 production of molecules such as transferrin that bind to iron with very high association  
51 constants (6, 13-15). Such nutritional immunity can be overcome by pathogens through the  
52 production of siderophores, as their very high iron affinity enables 'stealing' iron from the host  
53 (15). Siderophores are therefore an important virulence factor in both gram-negative- (16-18)  
54 and gram-positive human pathogens (19, 20).

55

56 In addition to iron, siderophores are known to bind to a range of potentially toxic metals (21).  
57 Crucially, these complexes cannot passively diffuse into the cell and consequently the metal is  
58 detoxified extracellularly (22). As a result, siderophore production has been shown to increase  
59 in the presence of toxic levels of a wide range of non-ferrous metals (2, 3, 8, 9, 21). As many  
60 of the metal ions that can be bound by siderophores are essential in small amounts, siderophore  
61 production is adjusted in response to metal bioavailability (23), with either active uptake of  
62 metal-siderophore complexes or other metal chelating compounds used to acquire these  
63 micronutrients when they are scarce (7, 24). Adjustments in production can be due to both  
64 genetic and phenotypic changes, with genetic mutations dictating the limits of siderophore  
65 production and phenotypic changes used to regulate production within those limits (25).  
66 Although the upper limit of production initially increases with metal toxicity, eventually a  
67 threshold is reached as the rising metabolic cost of siderophore production can result in  
68 selection for reduced production (8) – analogously to the evolutionary response to iron

69 deficiency (26). This cost is further exacerbated when competitors of the producer benefit from  
70 the siderophore (12). Consequently when there is strong selection for siderophore production,  
71 such as when toxic metals are at high concentrations, per capita siderophore production can be  
72 reduced (8, 26, 27). Phenotypic changes in production occur quickly in response to alterations  
73 in the environment, including the abundance of metals and population densities, and allow the  
74 cost of production to be minimised (22, 27).

75 Despite strong evidence both for siderophores playing an important role in metal detoxification  
76 (3, 8, 21, 23) and for siderophore production being an important determinant for bacterial  
77 virulence (15, 28, 29), whether the presence of toxic metals in non-host environments affects  
78 virulence remains untested. Here we aim to experimentally link the dual roles of siderophores  
79 by testing the effects of toxic copper on the virulence of the opportunistic human pathogen *P.*  
80 *aeruginosa*. *P. aeruginosa* is of clinical significance capable of surviving in a range of  
81 environments including soil, water and fomites in hospitals (30, 31). In clinical settings it is  
82 frequently responsible for severe and fatal infections of patients with cystic fibrosis (32), burns  
83 (33), and immunosuppressive illnesses (34).

84 The production of the main *P. aeruginosa* siderophore, pyoverdine, has been shown to both  
85 increase under copper stress (21) and to be a virulence factor (28, 35). It has also been shown  
86 to rapidly evolve (36). We therefore test virulence after both two days (~7 generations)  
87 and twelve days (~40 generations) (12, 37). To allow us to exclude phenotypic changes to  
88 production, at each timepoint (two and twelve days) populations are transferred to a common  
89 garden environment (copper free media) for 24 hours prior to assays. By quantifying  
90 pyoverdine production in every population before the virulence assay we are able to test  
91 whether its production is associated with virulence. Moreover, we test if this association is the  
92 same across two environmentally relevant copper concentrations that span those found in in  
93 agricultural soil (38). This paper therefore provides novel data on the role of metal pollution  
94 on bacterial virulence.

## 95 Methods

96

### 97 Experimental design

98 *Pseudomonas aeruginosa* PAO1 (39) was grown shaking for 24 hours in glass microcosms  
99 containing 6mL of King's medium B (KB; 10g glycerol, 20g proteose peptone no. 3, 1.5 g

100  $K_2HPO_4$ , 1.5 g  $MgSO_4$ , per litre) at 28°C. After homogenisation by vortexing, 60µL was added  
 101 to 18 microcosms containing KB mixed with sterilised copper sulphate ( $CuSO_4$ ; Alfa Aesar,  
 102 Massachusetts, United States) to final concentrations of either 0.0, 0.1 or 1.0 g/L. Inoculated  
 103 microcosms were kept static at 28°C for 48 hours before being thoroughly homogenised and  
 104 60µL (1% by volume) transferred into fresh media (Fig.1). Transfers occurred every two days  
 105 for twelve days. To control for the physiological effects of copper stress, on days two and  
 106 twelve all microcosms were homogenised and 60µL transferred into a common garden  
 107 environment (KB medium without copper). These cultures were grown for 24 hours before  
 108 pyoverdine production was quantified and aliquots were frozen at -80°C in glycerol at a final  
 109 concentration of 25% for virulence assays and to quantify density.  
 110

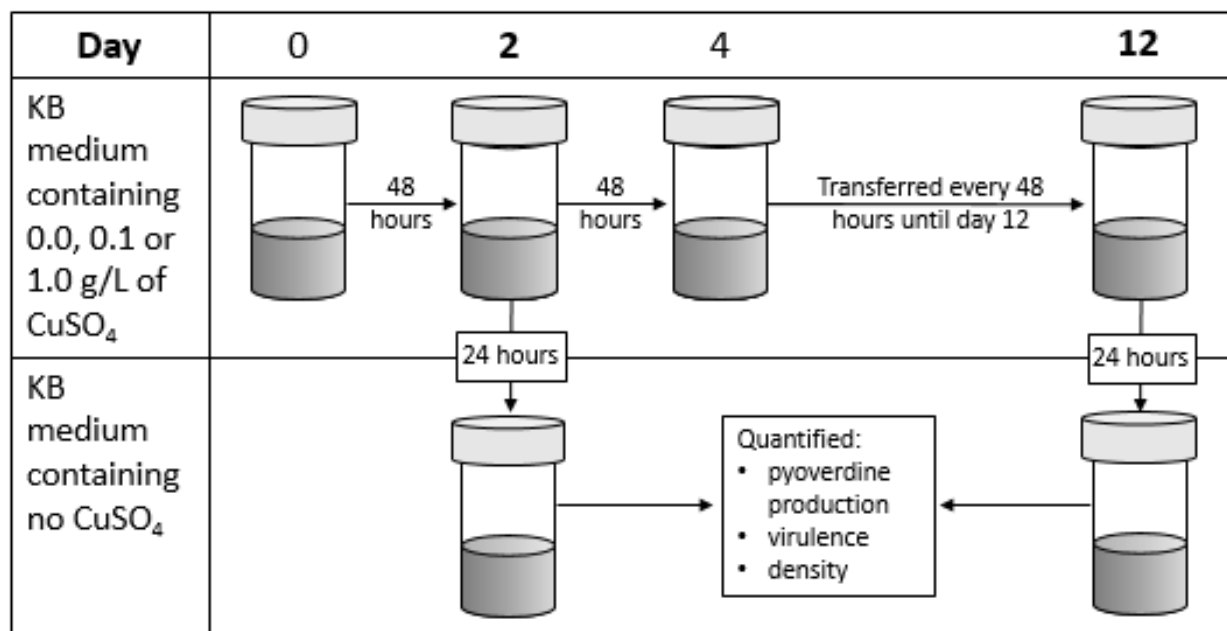

111  
 112  
 113 **Figure 1** Schematic of the experimental design used to test whether copper selects for  
 114 siderophore-mediated virulence. Microcosms (n=6 per treatment) containing KB medium at a  
 115 concentration of either 0.0, 0.1 or 1.0 g/L of copper sulphate ( $CuSO_4$ ) were inoculated with  
 116 *Pseudomonas aeruginosa*, incubated at 28°C and transferred every two days into fresh media.  
 117 On days two and twelve, cultures were transferred into copper free medium for 24 hours before  
 118 being homogenised, their per capita pyoverdine production quantified and frozen in glycerol  
 119 at a final concentration of 25%. Virulence and density assays were performed using defrosted  
 120 samples.  
 121

122 Pyoverdine assay

123 Pyoverdine production was quantified after both two and twelve days. Following 24 hrs in a  
124 common garden environment, cultures were thoroughly homogenised before 600µL was  
125 transferred into a 96 well-plate (200µL into three separate wells). The fluorescence at 460nm  
126 following excitation at 400 nm of each of the cultures in the 96-well plate was measured using  
127 a BioTek Synergy 2 plate reader (BioTek, Vermont, U.S.A.). Pyoverdine, which fluoresces  
128 green, is the only culture component quantified using these excitation and emission parameters,  
129 with non-producers giving a zero reading (4). Each culture was measured three times (one  
130 reading of each of three wells per culture) and the average of three sterile media readings  
131 (containing the relevant copper concentration) was used as a reference. The optical density  
132 measurements were used to estimate pyoverdine production per cell using: standardised  
133 fluorescence units / OD<sub>600</sub>. The average of the three technical replicates was used in the  
134 analysis.

135

136 Galleria mellonella virulence assay

137 To quantify virulence, we used the insect infection model *Galleria mellonella* (40). Briefly,  
138 defrosted samples were diluted 10<sup>5</sup>-fold in M9 salt buffer (3g KH<sub>2</sub>PO<sub>4</sub>, 6g Na<sub>2</sub>HPO<sub>4</sub>, 5g NaCl  
139 per litre) before 10µL was injected into 20 final instar larvae each per replicate using a 50µL  
140 Hamilton syringe (Hamilton, Nevada, USA). Larvae were then incubated at 37°C and mortality  
141 checked 18 hours post-injection. Larvae were classed as dead when mechanical stimulation of  
142 the head caused no response (41). M9-injected and non-injected controls were used to confirm  
143 mortality was not due to injection trauma or background *G. mellonella* mortality; >10% control  
144 death was the threshold for re-injecting (no occurrences).

145

146 Quantifying *Pseudomonas aeruginosa* density

147 The density of *P. aeruginosa* in the common garden environment was quantified by plating  
148 onto agar. To do this, samples were defrosted, serially diluted with M9 salt buffer and plated  
149 onto KB agar. After 48 hours incubation at 28°C colonies were counted and the number of  
150 colony forming units (CFU) standardised to CFUs per mL.

151

152 Statistical analysis

153 The effect of copper on per capita pyoverdine production (standardised fluorescence units /  
154 OD<sub>600</sub>) and density (CFU/mL) of *P. aeruginosa* populations was tested using linear mixed  
155 effects models (LMEM) with copper and time as explanatory variables (both factors), as well

156 as their 2-way interaction. To determine how copper affected virulence we used a binomial  
157 generalised linear mixed model (GLMM), with number of *G. mellonella* dead versus alive as  
158 binomial response variable, and copper and time as explanatory variables, as well as their two-  
159 way interaction. To analyse the combined effect of pyoverdine production and density on  
160 virulence, we used a similar framework and included pyoverdine production, total CFU and  
161 time, along with a two-way pyoverdine-time interaction, as explanatory variables. In all  
162 analyses, pyoverdine production and population density were  $\log_{10}$ -transformed to improve  
163 normality, and random intercepts were fitted for individual replicates to account for non-  
164 independency of observations over time.

165 For all analyses, we used the DHARMA package (42) to check residual behaviour, after  
166 which the most parsimonious model was arrived at by sequentially deleting terms and  
167 comparing model fits using  $\chi$  -tests where appropriate. These were followed by Tukey post  
168 hoc comparisons with the false detection rate due to multiple comparisons controlled for using  
169 the Benjamini and Hochberg method. All analyses were carried out in R version 3.3.3 (43),  
170 with the lme4 package used for the LMEMs and GLMMs (44).

171

172

## Results

173

### *Toxic copper selects for increased pyoverdine production*

174 Here we tested the evolutionary consequences of copper stress on *Pseudomonas aeruginosa*  
175 by incubating it with copper for either two or twelve days, and then without copper for one  
176 day. All results shown here therefore display the evolutionary consequences of copper stress,  
177 as the phenotypic effects are removed by the copper-free common garden environment step.  
178 In line with previous findings (3), pyoverdine production evolved to be significantly greater as  
179 a function of copper concentration (copper main effect:  $X^2=35.4$ , d.f.=2,  $p<0.001$ ). This effect  
180 was consistent across the two and twelve day treatments; however production was significantly  
181 greater after twelve days compared to two days (time main effect:  $X^2=161$ , d.f.=1,  $p<0.001$ ;  
182 Fig. 2). Pyoverdine production was significantly higher in the high copper treatment compared  
183 to both the control (two days:  $p<0.001$ ; twelve days:  $p<0.001$ ) and the low copper treatment  
184 (two days:  $p=0.032$ ; twelve days:  $p=0.032$ ). Likewise, the low copper treatment was always  
185 significantly higher than the control (two days:  $p=0.004$ ; twelve days:  $p=0.004$ ). The non-  
186 independence of observations between day two and day twelve samples accounted for only a  
187 small amount of the total variation ( $SD = 0.029$ ) in this model.  
188

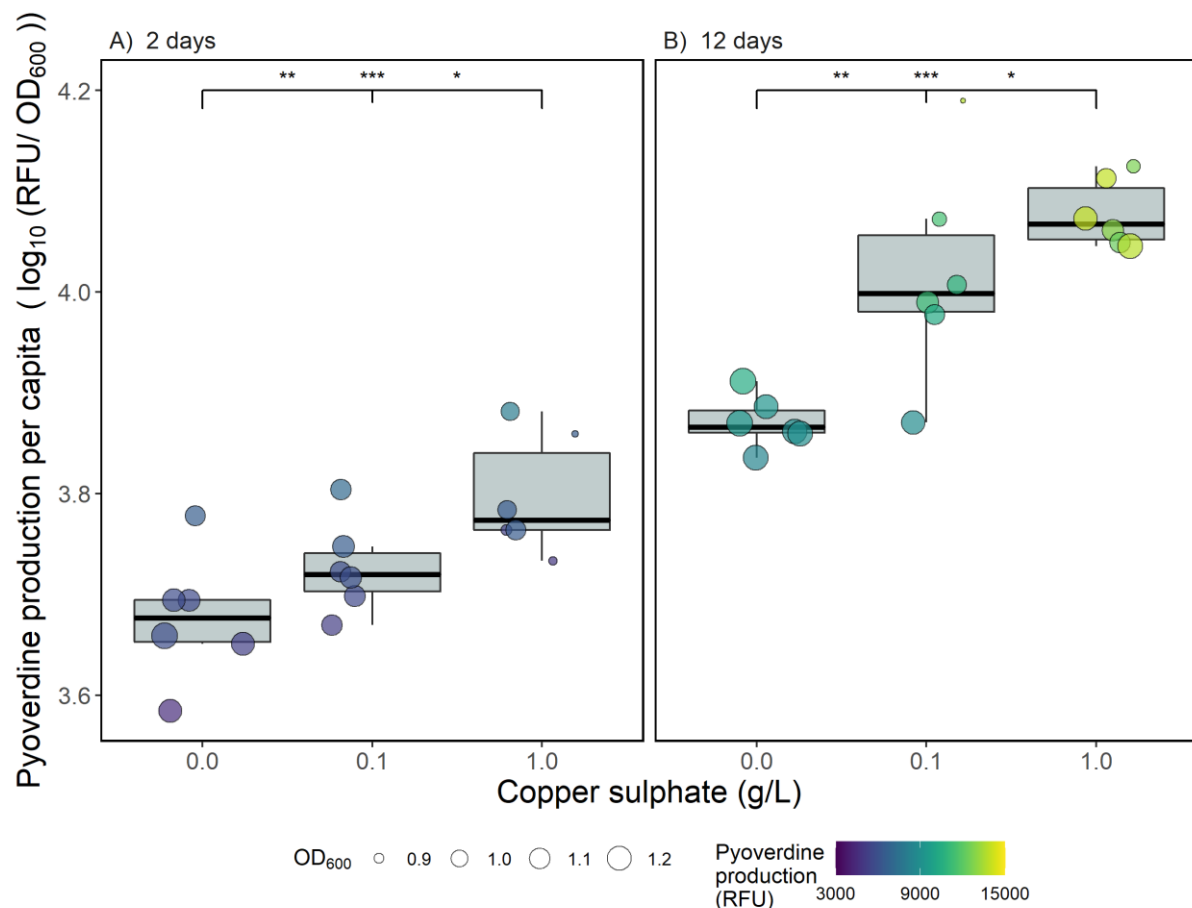

**Figure 2** Per capita pyoverdine production ( $\log_{10}$ -transformed standardised fluorescence units per  $OD_{600}$ ) by *Pseudomonas aeruginosa* populations after growth in different concentrations of copper for (A) two days + one day in the absence of copper, or (B) twelve days + one day in the absence of copper. Circles show individual replicates ( $n = 6$ ), with colour indicating total pyoverdine production (standardised fluorescence units) and size showing optical density at 600nm. Asterisks indicate significant differences between groups (\*\* = 0.01, \*\*\* = 0.001, \* = 0.05, NS = non-significant), with the left value comparing the control to the low copper treatment, the middle value comparing the control to the high copper treatment and the right value comparing the low and high copper treatments.

Virulence is higher in populations exposed to copper and this effect increases with time

To test whether copper stress caused differences in *P. aeruginosa* virulence, populations were assayed using the *Galleria mellonella* virulence model. Copper significantly increased virulence (copper main effect:  $X^2=20.8$ , d.f.=2,  $p<0.001$ ) with the degree to which increasing in time (copper-time interaction:  $X^2=6.90$ , d.f.=2,  $p=0.031$ ; Fig. 3). After two days, virulence was significantly higher in the two copper treatments compared to the control ( $p<0.001$  for

207 both comparisons) but these treatments did not differ themselves ( $p=0.34$ ). After twelve days  
208 virulence was again significantly higher in the two copper treatments than the control ( $p<0.001$   
209 for both comparisons), however the high copper treatment was found to be significantly more  
210 virulent than the low copper treatment ( $p=0.027$ ). We note these treatment effects were found  
211 despite the random effect of repeatedly measuring the same population accounting for a large  
212 amount of the variation ( $SD = 0.42$ ).

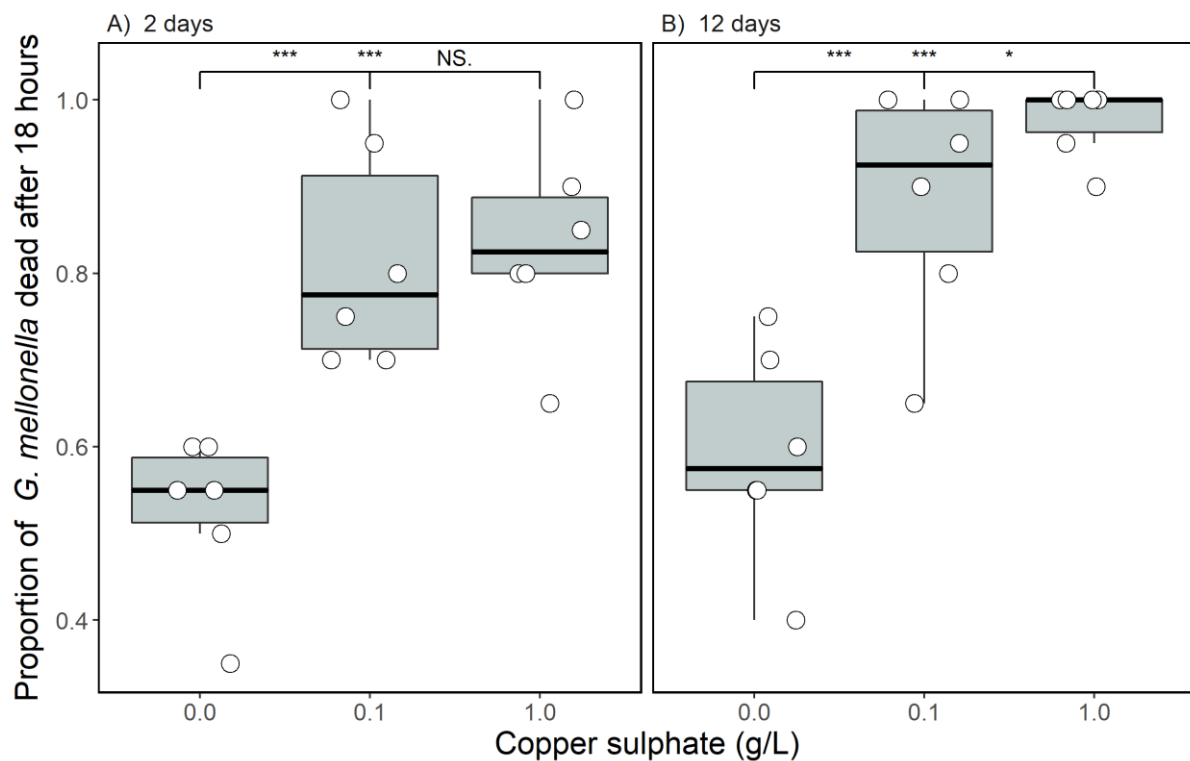

213

214

215 **Figure 3** The proportion of *Galleria mellonella* dead 18 hours after being injected with  
216 *Pseudomonas aeruginosa* grown in the presence or absence of copper for (A) two days (+ one  
217 day in the absence of copper) or (B) twelve days (+ one day in the absence of copper). 20 *G.*  
218 *mellonella* were injected per replicate (circles show individual replicates;  $n = 6$  per unique  
219 treatment combination). Asterisks indicate significant differences between groups (\*\*\*) =  
220 0.001, \*\* = 0.01, \* = 0.05, NS = non-significant), with the left value comparing the control to  
221 the low copper treatment, the middle value comparing the control to the high copper treatment  
222 and the right value comparing the low and high copper treatments.

223

#### 224 The effect of copper on population density differs over time

225 The effect of copper on population density differed as function of time (copper-time  
226 interaction:  $X^2=20.5$ , d.f.=2,  $p<0.001$ ; Fig. 4). After two days, population densities did not



227 significantly differ between any copper treatment ( $p > 0.060$  for all contrasts), whereas after  
228 twelve days of growth density was significantly lower in the two copper treatments compared  
229 to the control (high copper - control:  $p = 0.013$  and low copper - control:  $p = 0.002$ ) but did not  
230 differ themselves ( $p = 0.48$ ). The effect of measuring the same populations at two time points  
231 did not explain any of the overall variation in this model ( $SD = 0.0$ ).  
232

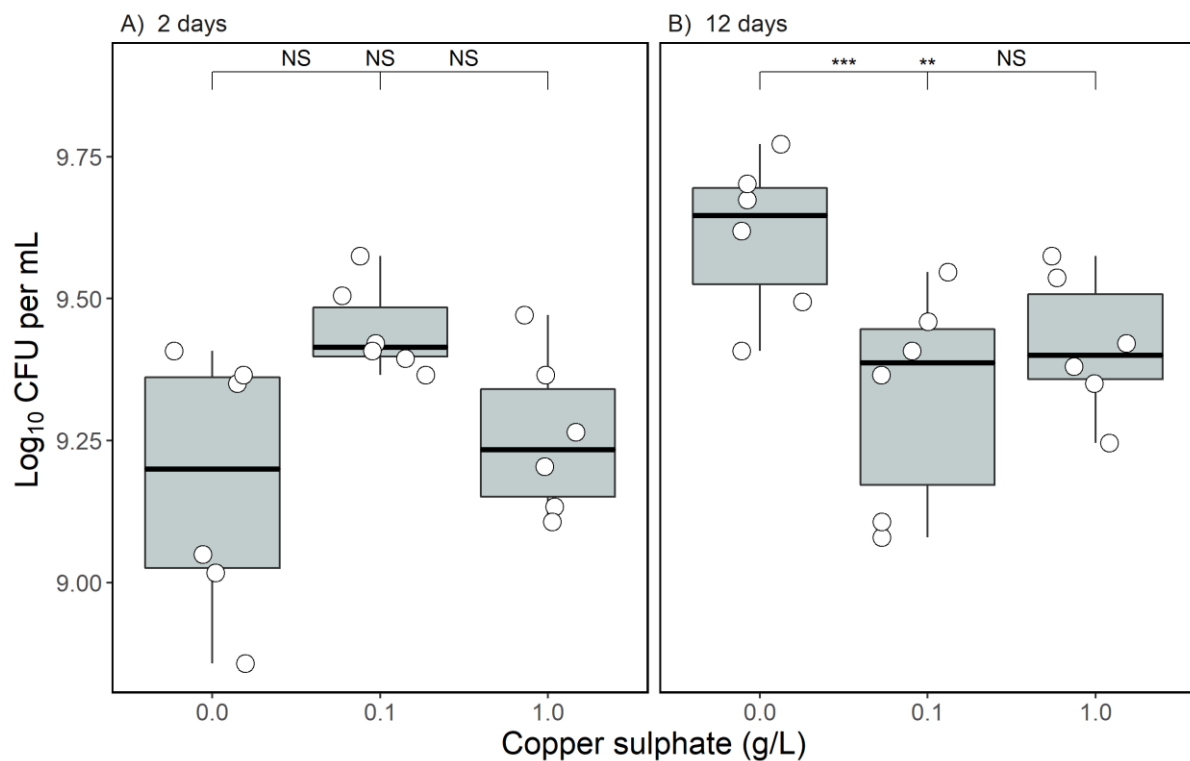

233

234

235 **Figure 4** The density ( $\log_{10}$  CFU  $\text{mL}^{-1}$ ) of *Pseudomonas aeruginosa* populations incubated  
236 with copper for two days + one day without copper (panel A) or twelve days + one day without  
237 copper (panel B). Asterisks indicate significant differences between groups (\*\*\* = 0.001, \*\* =  
238 0.01, \* = 0.05, NS = non-significant), with the left value comparing the control to the low  
239 copper treatment, the middle value comparing the control to the high copper treatment and the  
240 right value comparing the low and high copper treatments.

241

#### 242 Virulence is associated with increased pyoverdine production rather than pathogen load

243 Finally, we tested whether increased virulence was associated with increased pyoverdine  
244 production by replacing 'copper' as an explanatory variable in our GLMM with *per capita*  
245 pyoverdine production and included density as a covariate in this model. Despite there being  
246 substantial variation across populations ( $SD = 0.86$ ) in virulence, virulence increased as a

247 function of pyoverdine production (pyoverdine main effect:  $X^2=13.9$ , d.f.=1,  $p<0.001$ ; Fig. 5),  
248 and this effect did not change with time (pyoverdine-time interaction:  $X^2=0.009$ , d.f.=1,  
249  $p=0.93$ ) although virulence was higher after twelve days (time main effect:  $X^2=5.40$ , d.f.=1,  
250  $p=0.02$ ). Population density had no significant effect on virulence (main effect of density in  
251 GLMM:  $X^2=1.09$ , d.f.=2,  $p=0.30$ ).

252

253

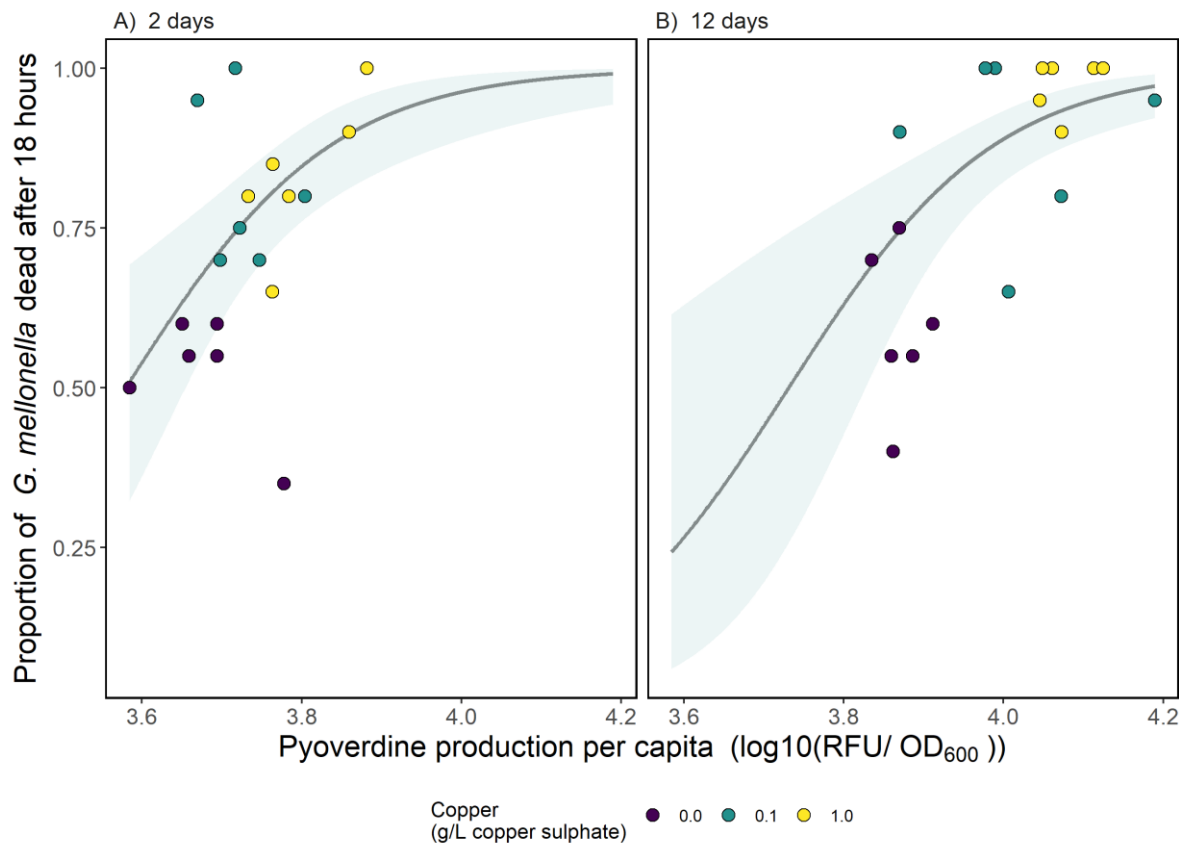

254

255 **Figure 5** The relationship between per capita pyoverdine production (log<sub>10</sub>-transformed  
256 standardised fluorescence units per OD<sub>600</sub>) and virulence of *P. aeruginosa* populations.  
257 Virulence was quantified using the *Galleria mellonella* infection model and expressed as the  
258 proportion of *G. mellonella* dead (out of 20) 18 hours after injection. Individual replicates are  
259 represented by circles (n = six per treatment); purple points represent the control (no copper)  
260 treatments, blue the low copper and yellow the high copper treatment. The line shows the best  
261 model fit and the shaded area shows the 95% confidence interval.

262

263

264

## Discussion

265

266 Here, we experimentally tested whether copper stress causes the evolution of increased  
267 siderophore-mediated virulence in *Pseudomonas aeruginosa*. We found copper to select for  
268 increased per capita pyoverdine production, which resulted in greater levels of death in the  
269 *Galleria mellonella* infection assay. Moreover, pyoverdine production was found to increase  
270 with time such that populations exposed to copper for twelve days were more virulent than  
271 those exposed for two days. In addition to this overall increase in virulence with time, high  
272 copper stress caused significantly greater virulence than low copper stress in the twelve day  
273 treatment but not in the two day treatment. As a result the twelve-day high copper treatment  
274 demonstrated the greatest virulence. This shows that copper stress increases pyoverdine  
275 production and consequently virulence, and that this effect increases with exposure time and  
276 copper concentration.

277

278 Finding copper-mediated increases in pyoverdine production is consistent with a role of  
279 pyoverdine in detoxification of copper in *P. aeruginosa* populations (45). Here we show that a  
280 prolonged need for copper detoxification leads to the continued evolution of greater  
281 siderophore production. The resulting cost of these genotypic changes to a metabolically costly  
282 trait is a likely explanation for the reduced densities in the twelve-day copper treatments. Apart  
283 from copper, pyoverdine production has been shown to be up-regulated in response to  $Al^{3+}$ ,  
284  $Ga^{3+}$ ,  $Mn^{2+}$  and  $Ni^{2+}$  (45). This suggests that these metals may also increase *P. aeruginosa*  
285 virulence, and may cause selection for increased production over longer exposure periods.  
286 Furthermore, it is likely that mixtures of metals, which are frequently encountered in polluted  
287 environments, might additively select for pyoverdine production and thereby virulence.

288

289 The positive association between pyoverdine production and virulence is consistent with  
290 previous findings, including in murine models (35). As well as directly aiding pathogen growth  
291 within a host by increasing iron uptake, pyoverdine production can increase virulence by  
292 causing the upregulation of additional virulence factors such as Exotoxin A and PrpL protease  
293 (46, 47). Finding per capita pyoverdine production to be a better predictor of virulence than  
294 population density in this system shows the cost of evolving greater production on density is  
295 inconsequential in a host. We note that in addition to pyoverdine production, copper stress has  
296 been shown to change the expression of over 300 genes in *P. aeruginosa* (48), and it is plausible  
297 these also have implications for virulence.

298

299 In addition to *P. aeruginosa*, toxic metals have also been shown to induce the production of  
300 (non-pyoverdine) siderophores in other species (10), with siderophore production being shown  
301 to increase proportionally with toxic metal pollution in natural microbial communities (9). As  
302 the copper concentrations used in this study were chosen for their environmental relevance, we  
303 suggest our findings could be relevant to natural communities in polluted environments. We  
304 note that remediation techniques, principally lime addition, are used in some metal-polluted  
305 areas to reduce their toxic effect (49), and this can lower community siderophore production  
306 (50). Extending experiments such as those described here to the level of natural communities  
307 could shed light on the consequences of metal pollution and metal remediation on bacterial  
308 siderophore production and virulence.

309

310 In conclusion, we experimentally show that copper stress increases the virulence of the  
311 pathogen *Pseudomonas aeruginosa* by selecting for increased production of a metal-  
312 detoxifying siderophore. We therefore demonstrate a direct link between toxic metal stress and  
313 virulence in an opportunistic pathogen of significant clinical importance. Furthermore, we  
314 show that the effect of metal exposure on virulence increases with exposure time and copper  
315 concentration. This raises further concern for the effect of ever-increasing metal pollution on  
316 bacterial pathogens, and highlights further work is needed to understand the role of metals in  
317 bacterial virulence.

318

319

## References

320

- 321 1. Cuív PÓ, Clarke P, O'Connell M. Identification and characterization of an iron-  
322 regulated gene, *chtA*, required for the utilization of the xenosiderophores aerobactin,  
323 rhizobactin 1021 and schizokinen by *Pseudomonas aeruginosa*. *Microbiology*.  
324 2006;152(4):945-54.
- 325 2. Rajkumar M, Ae N, Prasad MNV, Freitas H. Potential of siderophore-producing  
326 bacteria for improving heavy metal phytoextraction. *Trends in biotechnology*.  
327 2010;28(3):142-9.
- 328 3. Braud A, Geoffroy V, Hoegy F, Mislin G, Schalk I. The siderophores pyoverdine and  
329 pyochelin are involved in *Pseudomonas aeruginosa* resistance against metals: another  
330 biological function of these two siderophores. *Environ Microbiol Rep*. 2010;2:419-25.
- 331 4. Kümmerli R, Jiricny N, Clarke L, West S, Griffin A. Phenotypic plasticity of a  
332 cooperative behaviour in bacteria. *Journal of evolutionary biology*. 2009;22(3):589-98.
- 333 5. Winkelmann G. Ecology of siderophores with special reference to the fungi.  
334 *Biometals*. 2007;20(3-4):379.
- 335 6. Cassat JE, Skaar EP. Iron in infection and immunity. *Cell host & microbe*.  
336 2013;13(5):509-19.

- 337 7. Palmer LD, Skaar EP. Transition metals and virulence in bacteria. Annual review of  
338 genetics. 2016;50:67-91.
- 339 8. O'Brien S, Hodgson DJ, Buckling A. Social evolution of toxic metal bioremediation  
340 in *Pseudomonas aeruginosa*. Proceedings of the Royal Society B: Biological Sciences.  
341 2014;281(1787):20140858.
- 342 9. Hesse E, O'Brien S, Tromas N, Bayer F, Luján AM, van Veen EM, et al. Ecological  
343 selection of siderophore-producing microbial taxa in response to heavy metal contamination.  
344 Ecology letters. 2018;21(1):117-27.
- 345 10. Saha R, Saha N, Donofrio RS, Bestervelt LL. Microbial siderophores: a mini review.  
346 Journal of basic microbiology. 2013;53(4):303-17.
- 347 11. Hider RC, Kong X. Chemistry and biology of siderophores. Natural product reports.  
348 2010;27(5):637-57.
- 349 12. Griffin AS, West SA, Buckling A. Cooperation and competition in pathogenic  
350 bacteria. Nature. 2004;430(7003):1024-7.
- 351 13. Skaar EP. The battle for iron between bacterial pathogens and their vertebrate hosts.  
352 PLoS pathogens. 2010;6(8):e1000949.
- 353 14. Iatsenko I, Marra A, Boquete J-P, Peña J, Lemaitre B. Iron sequestration by  
354 transferrin 1 mediates nutritional immunity in *Drosophila melanogaster*. Proceedings of the  
355 National Academy of Sciences. 2020;117(13):7317-25.
- 356 15. Golonka R, San Yeoh B, Vijay-Kumar M. The iron tug-of-war between bacterial  
357 siderophores and innate immunity. Journal of innate immunity. 2019;11(3):249-62.
- 358 16. Granato E, Harrison F, Kümmerli R, Ross-Gillespie A. Do Bacterial “Virulence  
359 Factors” Always Increase Virulence. A Meta-Analysis of Pyoverdine Production in  
360 *Pseudomonas aeruginosa* As a Test Case Front Microbiol. 2016;7:1952.
- 361 17. Lam MM, Wyres KL, Judd LM, Wick RR, Jenney A, Brisse S, et al. Tracking key  
362 virulence loci encoding aerobactin and salmochelin siderophore synthesis in *Klebsiella*  
363 *pneumoniae*. Genome medicine. 2018;10(1):77.
- 364 18. Saleem M, Shah M. Detection of Siderophore production in Uropathogenic  
365 *Escherichia. coli* in patients with Type 2 Diabetes Mellitus. Int J Med Microbiol Trop Dis.  
366 2017;3:176-7.
- 367 19. Abergel RJ, Wilson MK, Arceneaux JE, Hoette TM, Strong RK, Byers BR, et al.  
368 Anthrax pathogen evades the mammalian immune system through stealth siderophore  
369 production. Proceedings of the National Academy of Sciences. 2006;103(49):18499-503.
- 370 20. Perry WJ, Spraggins JM, Sheldon JR, Grunenwald CM, Heinrichs DE, Cassat JE, et  
371 al. *Staphylococcus aureus* exhibits heterogeneous siderophore production within the  
372 vertebrate host. Proceedings of the National Academy of Sciences. 2019;116(44):21980-2.
- 373 21. Braud A, Geoffroy V, Hoegy F, Mislin GL, Schalk IJ. Presence of the siderophores  
374 pyoverdine and pyochelin in the extracellular medium reduces toxic metal accumulation in  
375 *Pseudomonas aeruginosa* and increases bacterial metal tolerance. Environmental  
376 Microbiology Reports. 2010;2(3):419-25.
- 377 22. Schalk IJ, Hannauer M, Braud A. New roles for bacterial siderophores in metal  
378 transport and tolerance. Environmental microbiology. 2011;13(11):2844-54.
- 379 23. Höfte M, Buysens S, Koedam N, Cornelis P. Zinc affects siderophore-mediated high  
380 affinity iron uptake systems in the rhizosphere *Pseudomonas aeruginosa* 7NSK2. Biometals.  
381 1993;6(2):85-91.
- 382 24. Lhospice S, Gomez NO, Ouerdane L, Brutesco C, Ghsssein G, Hajjar C, et al.  
383 *Pseudomonas aeruginosa* zinc uptake in chelating environment is primarily mediated by the  
384 metallophore pseudopaline. Scientific reports. 2017;7(1):1-10.

- 385 25. Harrison F, Paul J, Massey RC, Buckling A. Interspecific competition and  
386 siderophore-mediated cooperation in *Pseudomonas aeruginosa*. *The ISME journal*.  
387 2008;2(1):49-55.
- 388 26. Dumas Z, Kümmerli R. Cost of cooperation rules selection for cheats in bacterial  
389 metapopulations. *Journal of evolutionary biology*. 2012;25(3):473-84.
- 390 27. Kümmerli R, Jiricny N, Clarke LS, West SA, Griffin AS. Phenotypic plasticity of a  
391 cooperative behaviour in bacteria. *Journal of evolutionary biology*. 2009;22(3):589-98.
- 392 28. Meyer J-M, Neely A, Stintzi A, Georges C, Holder IA. Pyoverdine is essential for  
393 virulence of *Pseudomonas aeruginosa*. *Infection and immunity*. 1996;64(2):518-23.
- 394 29. Buckling A, Harrison F, Vos M, Brockhurst MA, Gardner A, West SA, et al.  
395 Siderophore-mediated cooperation and virulence in *Pseudomonas aeruginosa*. *FEMS*  
396 *microbiology ecology*. 2007;62(2):135-41.
- 397 30. Rice LB. Federal funding for the study of antimicrobial resistance in nosocomial  
398 pathogens: no ESKAPE. The University of Chicago Press; 2008.
- 399 31. Rutherford V, Yom K, Ozer EA, Pura O, Hughes A, Murphy KR, et al.  
400 Environmental reservoirs for *exoS*<sup>+</sup> and *exoU*<sup>+</sup> strains of *Pseudomonas aeruginosa*.  
401 *Environmental microbiology reports*. 2018;10(4):485-92.
- 402 32. Roy-Burman A, Savel RH, Racine S, Swanson BL, Revadigar NS, Fujimoto J, et al.  
403 Type III protein secretion is associated with death in lower respiratory and systemic  
404 *Pseudomonas aeruginosa* infections. *The Journal of infectious diseases*. 2001;183(12):1767-  
405 74.
- 406 33. Japoni A, Farshad S, Alborzi A. *Pseudomonas aeruginosa*: burn infection, treatment  
407 and antibacterial resistance. *Iranian Red Crescent Medical Journal*. 2009;11(3):244-53.
- 408 34. Fergie JE, Shema SJ, Lott L, Crawford R, Patrick CC. *Pseudomonas aeruginosa*  
409 bacteremia in immunocompromised children: analysis of factors associated with a poor  
410 outcome. *Clinical infectious diseases*. 1994;18(3):390-4.
- 411 35. Kang D, Revtovich AV, Chen Q, Shah KN, Cannon CL, Kirienko NV. Pyoverdine-  
412 dependent virulence of *Pseudomonas aeruginosa* isolates from cystic fibrosis patients.  
413 *Frontiers in microbiology*. 2019;10:2048.
- 414 36. Harrison F, Buckling A. Cooperative production of siderophores by *Pseudomonas*  
415 *aeruginosa*. *Front Biosci*. 2009;14:4113-26.
- 416 37. Stilwell P, O'Brien S, Hesse E, Lowe C, Gardner A, Buckling A. Resource  
417 heterogeneity and the evolution of public goods cooperation. *Evolution letters*.  
418 2020;4(2):155-63.
- 419 38. Brun L, Maillet J, Richarte J, Herrmann P, Remy J. Relationships between extractable  
420 copper, soil properties and copper uptake by wild plants in vineyard soils. *Environmental*  
421 *pollution*. 1998;102(2-3):151-61.
- 422 39. O'Brien S, Luján AM, Paterson S, Cant MA, Buckling A. Adaptation to public goods  
423 cheats in *Pseudomonas aeruginosa*. *Proceedings of the Royal Society B: Biological Sciences*.  
424 2017;284(1859):20171089.
- 425 40. Harrison F, Browning LE, Vos M, Buckling A. Cooperation and virulence in acute  
426 *Pseudomonas aeruginosa* infections. *BMC biology*. 2006;4(1):21.
- 427 41. Hernandez RJ, Hesse E, Dowling AJ, Coyle NM, Feil EJ, Gaze WH, et al. Using the  
428 wax moth larva *Galleria mellonella* infection model to detect emerging bacterial pathogens.  
429 *PeerJ*. 2019;7:e6150-e.
- 430 42. Hartig F. DHARMA: Residual Diagnostics for Hierarchical (Multi-Level / Mixed)  
431 Regression Models. R package version 042 2021.
- 432 43. Team RC. R: A language and environment for statistical computing. R Foundation for  
433 Statistical Computing.

- 434 44. Douglas Bates MM, Ben Bolker, Steve Walker. Fitting Linear Mixed-Effects Models  
435 Using lme4. *Journal of Statistical Software*. 2015;67(1):1-48.
- 436 45. Braud A, Hoegy F, Jezequel K, Lebeau T, Schalk IJ. New insights into the metal  
437 specificity of the *Pseudomonas aeruginosa* pyoverdine–iron uptake pathway. *Environmental*  
438 *microbiology*. 2009;11(5):1079-91.
- 439 46. Lamont IL, Beare PA, Ochsner U, Vasil AI, Vasil ML. Siderophore-mediated  
440 signaling regulates virulence factor production in *Pseudomonas aeruginosa*. *Proceedings of*  
441 *the National Academy of Sciences*. 2002;99(10):7072-7.
- 442 47. Lopez-Medina E, Fan D, Coughlin LA, Ho EX, Lamont IL, Reimann C, et al.  
443 *Candida albicans* inhibits *Pseudomonas aeruginosa* virulence through suppression of  
444 pyochelin and pyoverdine biosynthesis. *PLoS Pathog*. 2015;11(8):e1005129.
- 445 48. Teitzel GM, Geddie A, Susan K, Kirisits MJ, Whiteley M, Parsek MR. Survival and  
446 growth in the presence of elevated copper: transcriptional profiling of copper-stressed  
447 *Pseudomonas aeruginosa*. *Journal of bacteriology*. 2006;188(20):7242.
- 448 49. Palansooriya KN, Shaheen SM, Chen SS, Tsang DCW, Hashimoto Y, Hou D, et al.  
449 Soil amendments for immobilization of potentially toxic elements in contaminated soils: A  
450 critical review. *Environment international*. 2020;134:105046.
- 451 50. Hesse E, Padfield D, Bayer F, Van Veen EM, Bryan CG, Buckling A. Anthropogenic  
452 remediation of heavy metals selects against natural microbial remediation. *Proceedings of the*  
453 *Royal Society B*. 2019;286(1905):20190804.
- 454 51. Seiler C, Berendonk T. Heavy metal driven co-selection of antibiotic resistance in soil  
455 and water bodies impacted by agriculture and aquaculture. *Frontiers in Microbiology*.  
456 2012;3(399).
- 457 52. Paul D. Research on heavy metal pollution of river Ganga: A review. *Annals of*  
458 *Agrarian Science*. 2017;15(2):278-86.
- 459 53. Chou C, Haya K, Paon L, Burridge L, Moffatt J. Aquaculture-related trace metals in  
460 sediments and lobsters and relevance to environmental monitoring program ratings for near-  
461 field effects. *Marine Pollution Bulletin*. 2002;44(11):1259-68.
- 462 54. Berg J, Tom-Petersen A, Nybroe O. Copper amendment of agricultural soil selects for  
463 bacterial antibiotic resistance in the field. *Letters in Applied Microbiology*. 2005;40(2):146-  
464 51.
- 465 55. Bruins MR, Kapil S, Oehme FW. Microbial resistance to metals in the environment.  
466 *Ecotoxicology and environmental safety*. 2000;45(3):198-207.
- 467 56. Giller KE, Witter E, McGrath SP. Toxicity of heavy metals to microorganisms and  
468 microbial processes in agricultural soils: a review. *Soil biology and biochemistry*.  
469 1998;30(10-11):1389-414.
- 470 57. Makvandi P, Wang Cy, Zare EN, Borzacchiello A, Niu Ln, Tay FR. Metal-based  
471 nanomaterials in biomedical applications: Antimicrobial activity and cytotoxicity aspects.  
472 *Advanced Functional Materials*. 2020:1910021.
- 473 58. Vincent M, Hartemann P, Engels-Deutsch M. Antimicrobial applications of copper.  
474 *International journal of hygiene and environmental health*. 2016;219(7):585-91.
- 475
